# Supplementary material
Source: PubMed Central journal article supplement (PMC5929111)

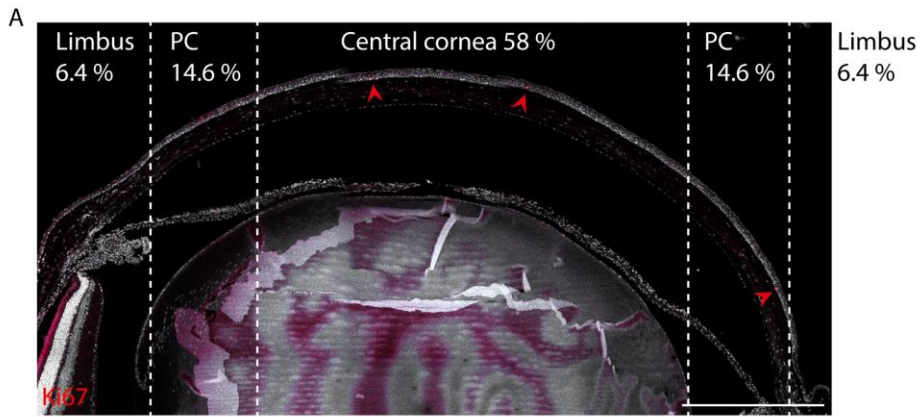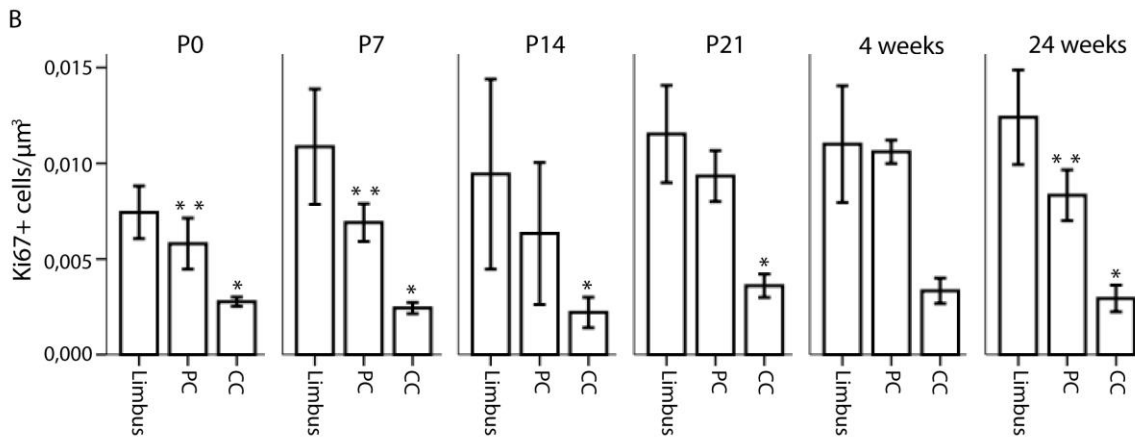

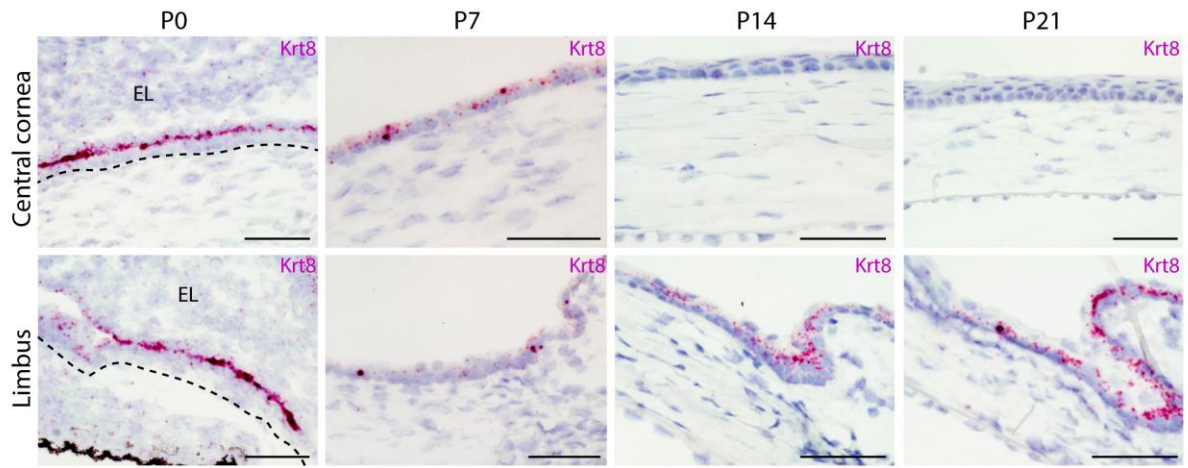

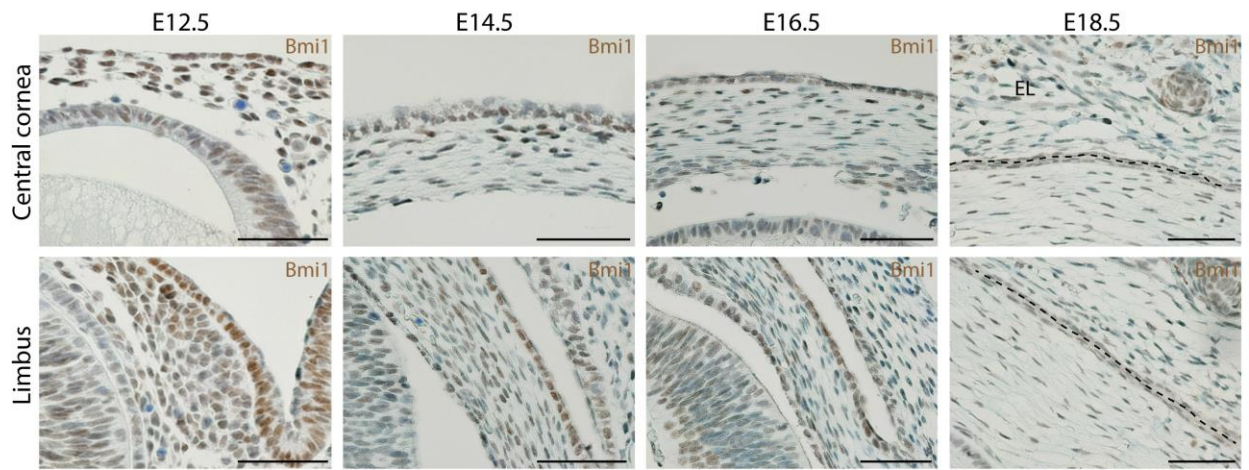

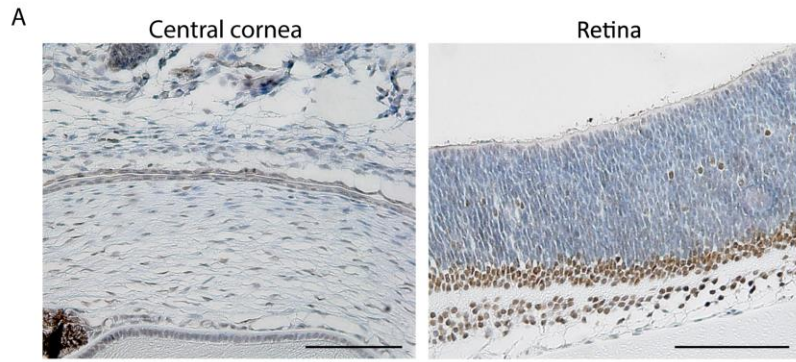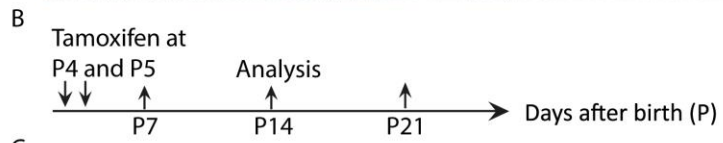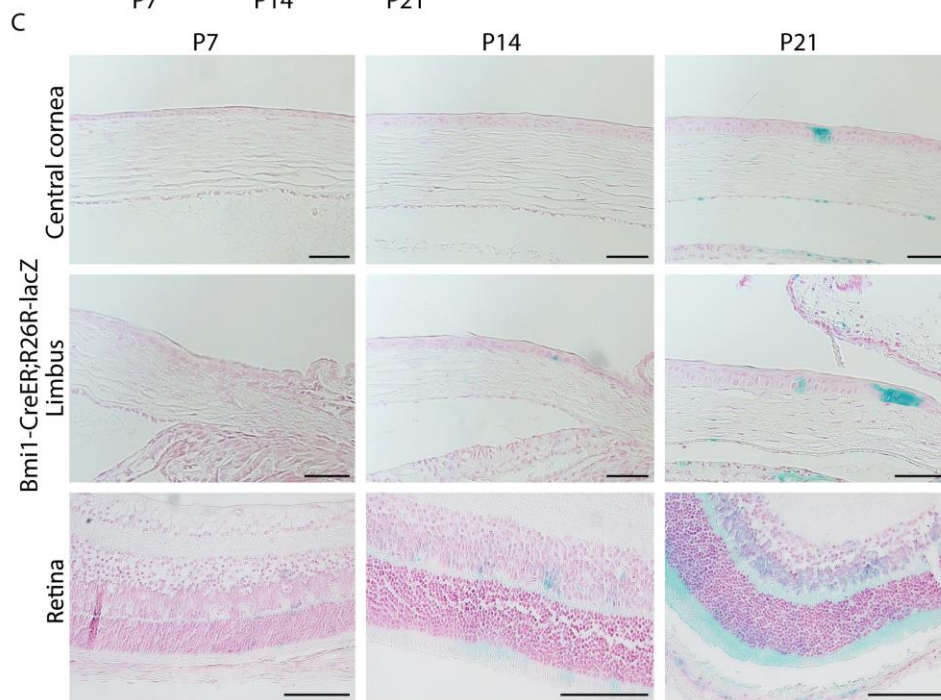

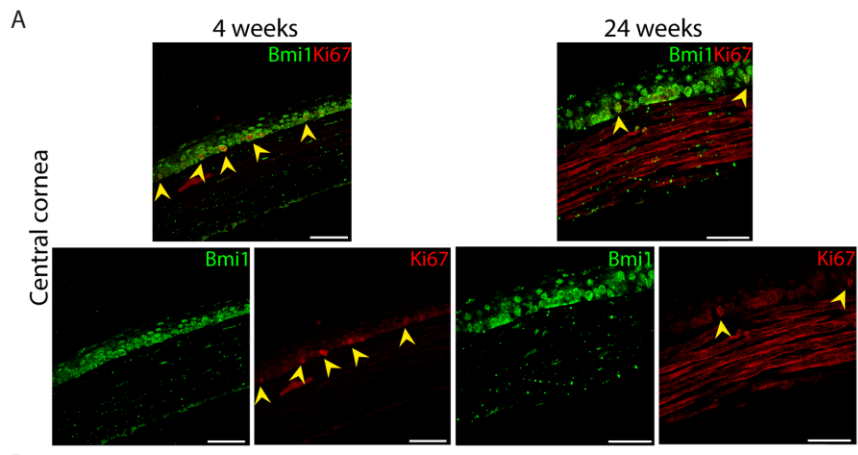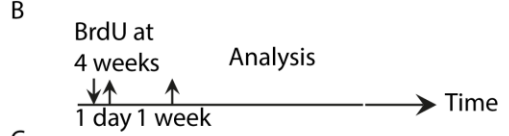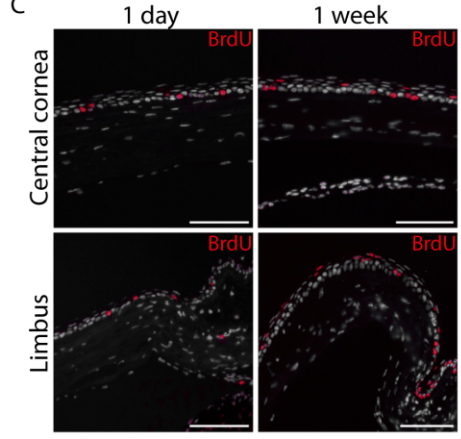



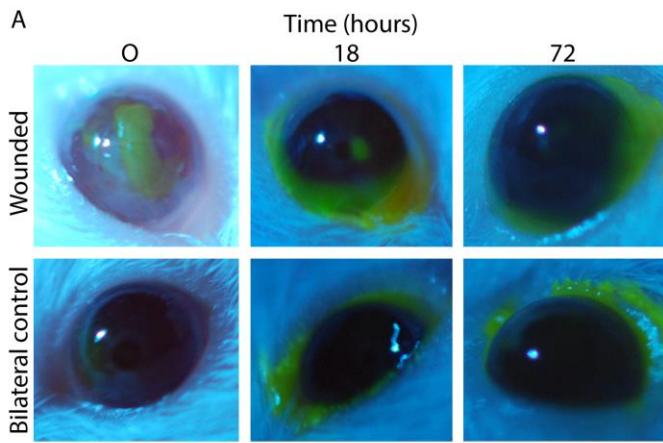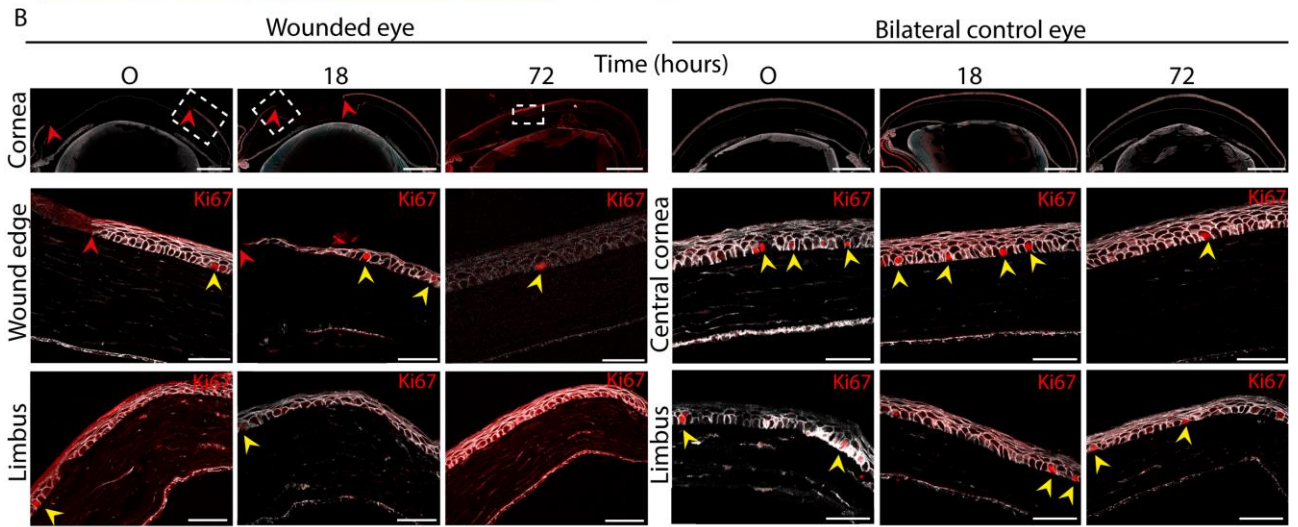

Supplement: NIHMS961152-supplement-supplement_1.pdf [file NIHMS961152-supplement-supplement_1.pdf]
